# Supplementary material for: Bed nucleus of the stria terminalis regulates fear to unpredictable threat signals
Source: eLife. 2019 Apr 4;8:e46525. doi: 10.7554/eLife.46525 (PMC6456295; doi:10.7554/eLife.46525)
Supplement: Figure 1—source data 1. [file elife-46525-fig1-data1.xlsx]

## Sheet: Fig. 1
Figure 1			Conditioning							Test
			Freezing (%)							Freezing (%)
			BL	Two-trial blocks						BL	Two-trial blocks						Test (trials 1-6)
RAT #	COHORT #	GROUP ASSIGNMENT		1	2	3	4	5	6		1	2	3	4	5	6	Freezing (%)
15b	2	FW-NBQX	0.869	27.647	59.265	6.765	30.441	26.618	20.974	20.187	89.429	83.286	80.571	84.571	87.571	97	84.429
31b	2	FW-NBQX	0	7.059	9.265	31.912	44.118	12.206	15.69	92.914	92	96.143	94	94	93.429	89.143	94.048
23b	2	FW-NBQX	0.401	25.882	49.853	59.706	32.647	38.382	34.954	51.136	99.714	99.571	96.857	95.714	70	64	98.714
27b	2	FW-NBQX	2.941	56.765	72.647	56.912	79.853	75.294	75.142	68.984	99.714	100	96.571	87.571	94.429	86.571	98.762
3b	2	FW-VEH	0.869	29.706	64.853	31.912	54.853	46.176	0	67.112	94.857	99.857	100	100	100	74	98.238
12b	2	FW-VEH	1.738	10	23.971	66.324	26.029	33.676	57.647	43.85	78.571	81	87.857	79.286	62.857	90.714	82.476
20b	2	FW-VEH	0	16.029	25.588	31.176	38.382	33.382	40.269	5.548	93.714	99.429	88.286	98.143	93	81.571	93.81
32b	2	FW-VEH	9.225	57.5	34.412	62.353	53.382	58.824	60.051	64.238	98.714	97.714	99.571	78.714	91.857	87.571	98.667
16b	2	FW-VEH	0.334	3.529	49.412	40.147	24.118	47.353	36.82	62.166	98.429	100	92	94.714	98.714	99.857	96.81
13a	1	BW-NBQX	0	9.559	7.794	0	16.176	1.029	3.676	53.476	36.143	36.143	42.714	22.143	30.571	16.571	38.333
29a	1	BW-NBQX	0	13.088	33.088	51.324	47.594	28.382	38.529	21.457	61.143	37.714	24.857	35.857	39.286	20.857	41.238
18a	1	BW-NBQX	3.008	6.912	56.176	73.529	44.327	64.706	74.853	21.992	3.571	28.286	69.857	49.571	30	11.429	33.905
1a	1	BW-NBQX	9.091	32.059	15.147	54.118	65.647	49.559	33.971	25.067	66.714	76.714	83.571	81.857	41.143	45.571	75.667
9a	1	BW-NBQX	0	27.794	80.294	81.912	27.012	71.176	65.441	24.265	64.571	60.143	62.714	44.571	7.714	49.571	62.476
5a	1	BW-NBQX	2.874	47.647	64.559	50	77.096	56.324	69.853	30.548	64.143	55.286	65	17.714	4.143	13.286	61.476
25a	1	BW-NBQX	0.535	26.176	48.088	63.235	71.673	67.941	67.059	24.131	42.714	59.571	37.429	59.857	60.429	59	46.571
30b	2	BW-NBQX	0.735	5.294	4.412	33.824	22.155	16.324	21.176	49.465	26.429	33.429	19	31	50.429	40.571	26.286
5b	2	BW-NBQX	1.07	12.353	30.588	49.265	45.065	48.382	54.265	78.543	72	75.143	70.857	53.143	67.714	63	72.667
17b	2	BW-NBQX	0	36.765	55	68.971	57.728	78.824	63.676	62.701	92.714	93.429	35.714	53.143	47	67.429	73.952
9b	2	BW-NBQX	0.334	19.412	26.029	44.853	20.409	47.794	39.265	38.369	29.714	19.857	30.143	54.857	12	38.429	26.571
26b	2	BW-NBQX	1.203	21.029	34.853	51.176	11.458	44.412	52.206	59.826	67	12.714	6.857	83	91.286	72.429	28.857
22a	1	BW-VEH	0.802	27.059	80.441	55.294	67.999	61.471	40.882	56.016	88.857	70.857	87	40.429	56.857	40.714	82.238
2a	1	BW-VEH	0.334	33.824	42.794	26.618	16.722	20.588	52.941	15.575	55.286	62.286	65.143	64.714	61.143	93.429	60.905
26a	1	BW-VEH	1.671	2.206	46.176	58.971	51.405	50.588	33.824	4.479	43.714	59.429	48.857	22.143	34	51	50.667
6a	1	BW-VEH	10.094	68.088	68.824	88.529	22.163	76.324	83.088	64.305	91.143	97	62	63.857	81.571	31.714	83.381
21a	1	BW-VEH	0.334	9.853	32.647	42.794	67.852	7.941	19.853	34.893	64.286	40.429	59.571	56.286	60.857	45.143	54.762
30a	1	BW-VEH	1.604	10.882	32.5	42.5	42.747	23.971	50	22.326	91.286	94.857	90.286	6.857	19.429	88.857	92.143
14a	1	BW-VEH	12.567	24.118	68.824	86.618	42.036	47.5	66.765	17.848	82.429	93.429	81.143	77.143	51.429	13.429	85.667
10a	1	BW-VEH	0.334	17.5	12.353	30.294	26.153	33.088	11.912	45.521	97.286	98.857	98.571	91.571	54.143	52	98.238
18b	2	BW-VEH	1.404	54.853	44.559	44.853	25.859	26.176	25.441	65.441	94.714	89.286	81.571	84	93	29.429	88.524
6b	2	BW-VEH	1.003	24.706	46.471	27.353	46.529	39.559	36.912	53.476	85.429	99.714	89.143	91.714	89.714	52.143	91.429
22b	2	BW-VEH	0	5.735	33.971	14.853	33.167	32.5	60.588	22.259	77	85.857	7.714	22.286	2.571	35.857	56.857
14b	2	BW-VEH	2.406	6.618	38.676	82.206	29.551	49.706	57.059	59.024	96.429	100	95.857	87.714	25.429	10.286	97.429
24b	2	BW-VEH	1.671	16.618	63.824	42.794	59.759	22.059	40.882	88.102	97.857	100	98.571	99.857	96.429	93.429	98.81
3a	1	NoCS-NBQX	1.003	35.588	43.382	56.029	45.279	44.265	20.441	14.439	5.714	20	10.714	15.286	21.571	59.429	12.143
7a	1	NoCS-NBQX	0.334	9.412	31.029	25.882	23.314	29.118	51.176	7.487	10	2.571	28	46.857	39.571	41	13.524
15a	1	NoCS-NBQX	0	1.912	14.706	27.059	34.994	9.265	37.206	11.43	8.714	25.143	8.286	21	54.286	29.857	14.048
11a	1	NoCS-NBQX	11.832	66.029	85.147	89.118	76.199	87.941	80.882	72.46	38.714	66	29.857	33.286	33.714	66.143	44.857
27a	1	NoCS-NBQX	0	30.294	32.941	26.912	28.803	12.5	45	35.361	56.857	74.429	12.286	74.286	86.286	70	47.857
23a	1	NoCS-NBQX	5.214	9.559	35.294	27.059	36.721	42.941	49.265	39.973	38.143	51.429	89	88.429	86	47	59.524
31a	1	NoCS-NBQX	0	21.471	63.676	79.118	76.809	80.735	76.176	59.024	92.857	94.143	48	15.714	23.571	33	78.333
19a	1	NoCS-NBQX	0	21.912	24.412	11.324	28.061	36.176	35	62.834	88.429	77.714	71.714	65.571	25.714	64.857	79.286
16a	1	NoCS-VEH	0	36.765	13.529	60.735	36.287	45.294	27.5	4.278	18	8.857	5	23.429	28.857	28.714	10.619
20a	1	NoCS-VEH	0.735	9.559	58.235	37.941	30.551	37.794	36.471	15.909	38.714	12.857	22.143	78.429	22	28.714	24.571
12a	1	NoCS-VEH	0.401	47.941	41.912	60.441	58.033	52.5	59.412	61.698	39	29.571	8.429	33.429	32.857	25.143	25.667
32a	1	NoCS-VEH	5.013	13.088	27.059	46.324	50.669	56.765	65.147	13.636	38.857	40.857	61.571	71.143	76.286	32.571	47.095
24a	1	NoCS-VEH	14.973	64.853	76.912	61.471	68.561	62.206	56.618	40.174	53	86.429	11.143	38	2.714	12	50.19
4a	1	NoCS-VEH	0	19.412	8.971	25.147	65.062	21.912	39.706	29.88	63.857	51.143	51.143	34.143	9.429	79.571	55.381
28a	1	NoCS-VEH	0.936	34.412	82.059	64.265	70.056	49.559	51.471	45.187	74.714	36.286	88	83.143	54.286	39.429	66.333
8a	1	NoCS-VEH	20.722	22.206	35.735	60.441	21.861	48.676	38.235	67.045	82.286	95.571	42	12.714	11.286	7.286	73.286

## Sheet: Fig. 1 - Fig. Supp. 3
Fig. 1 - Fig. Supp. 3			Conditioning						Test
			Freezing (%)						Freezing (%)
			BL	Trial					BL	Trial					Test (trials 1-5)
RAT #	COHORT #	GROUP ASSIGNMENT		1	2	3	4	5		1	2	3	4	5	Freezing (%)
26a	1	BW-NBQX	0	0	1.471	8.529	29.118	31.765	1.228	2	0	19.429	20.571	0.286	8.457
6a	1	BW-NBQX	15.29	34.412	81.765	23.824	23.235	23.529	60.268	39.143	61.143	58.571	25.714	28.857	42.686
10a	1	BW-NBQX	0	0	6.471	7.353	37.941	54.412	20.759	26.857	60.286	23.429	57.143	29.714	39.486
18a	1	BW-NBQX	0.781	43.235	46.176	44.412	48.529	49.706	30.469	75.714	64	76.571	52	76.571	68.971
5a	1	BW-NBQX	3.348	52.059	90.588	69.412	30	17.941	15.067	1.429	3.429	23.429	13.714	13.429	11.086
2a	1	BW-NBQX	0.67	20.294	35.588	12.059	46.176	34.118	20.201	21.714	14.857	37.429	19.714	7.429	20.229
25a	1	BW-VEH	1.562	25.294	20.294	34.118	8.529	30.294	54.018	64.857	70.286	80	52.286	58.286	65.143
13a	1	BW-VEH	0	11.176	37.941	49.706	61.176	43.529	79.241	92	88.571	46.571	25.143	53.429	61.143
17a	1	BW-VEH	2.344	18.235	41.765	65.588	41.765	48.529	8.371	39.429	55.429	45.429	36.286	20.286	39.371
22a	1	BW-VEH	0	0	0	0	0	50.882	1.897	16	26.857	0	30	13.429	17.257
21a	1	BW-VEH	1.786	11.765	22.941	48.235	55	50.588	43.304	21.714	2.857	53.714	32.857	60	34.229
9a	1	BW-VEH	1.897	17.353	37.941	70.294	46.765	14.118	3.013	18	30.286	6	26.571	11.429	18.457
1a	1	BW-VEH	0	0	34.706	39.118	22.941	70.882	8.705	27.714	11.143	24.286	30.571	35.429	25.829
8a	1	FW-NBQX	0	25.882	0	5.294	7.353	18.621	5.022	60.857	85.143	89.143	92	92	83.829
20a	1	FW-NBQX	0.558	5.294	2.059	2.647	10.294	48.276	22.433	87.429	98.571	99.143	100.286	80.857	93.257
24a	1	FW-NBQX	0.781	15.882	5.882	18.235	5.294	10	25.335	34	47.429	58	40.286	46	45.143
28a	1	FW-NBQX	8.929	58.235	35	30.294	73.529	67.931	1.562	58.571	99.714	100	100	100	91.657
12a	1	FW-NBQX	0.558	7.353	36.471	18.824	23.824	21.724	22.656	93.429	99.429	98	99.143	98.286	97.657
16a	1	FW-NBQX	0	0	0	11.176	50.294	36.552	16.741	45.714	62.571	49.429	30.571	43.714	46.4
23a	1	FW-VEH	3.013	11.471	36.176	45.294	46.471	23.793	11.272	54.857	90	99.429	79.143	92.857	83.257
11a	1	FW-VEH	24.33	81.176	90.588	32.059	22.353	33.793	21.54	96	97.429	98.857	99.143	94	97.086
3a	1	FW-VEH	0.893	0	10.294	10.882	1.765	6.897	5.246	38.571	78	31.143	52	15.714	43.086
7a	1	FW-VEH	0	11.765	29.412	15	34.706	29.31	32.031	97.429	99.714	98	98	65.714	91.771
15a	1	FW-VEH	0	18.235	13.824	0	3.824	41.034	6.92	16.571	57.714	75.429	56.857	49.714	51.257
27a	1	FW-VEH	0	3.529	61.471	20.882	17.647	27.931	34.933	91.714	87.429	89.429	89.429	81.429	87.886

## Sheet: Fig. 1 - Fig. Supp. 5
Fig. 1 - Fig. Supp. 5			Conditioning								Conditioning
			Freezing (%)								Shock-induced activity
			BL	Two-trial blocks						Conditioning (BL)	Two-shock blocks						Conditioning (Shocks 1-12)
RAT #	COHORT #	GROUP ASSIGNMENT		1	2	3	4	5	6	Activity	1	2	3	4	5	6	Shock-induced activity
1a	1	BW	12.032	58.088	58.529	52.647	81.649	62.059	73.382	55.293	70.791	84.739	55.125	68.909	64.819	63.56	67.99
2a	1	BW	15.441	61.176	87.206	65.588	81.49	85.882	78.529	32.085	77.437	75.999	65.762	71.736	76.038	67.69	72.443
3a	1	BW	9.759	57.5	81.618	83.088	61.862	71.324	70.882	58.317	93.125	68.884	83.955	61.46	67.795	62.471	72.948
4a	1	BW	63.035	53.088	65.441	88.971	62.683	84.412	79.412	13.46	66.599	67.192	70.876	77.712	75.669	66.094	70.691
9a	1	BW	1.07	3.529	40.147	19.853	51.382	26.324	32.059	41.951	83.901	88.838	65.82	83.826	70.405	80.808	78.933
10a	1	BW	14.505	31.176	32.206	44.559	67.544	17.941	40.882	25.841	63.748	63.02	72.585	70.588	72.212	55.466	66.27
11a	1	BW	0	25.882	41.471	65.735	81.053	34.706	21.176	72.131	97.883	90.894	82.578	84.119	88.806	82.974	87.876
12a	1	BW	7.888	48.824	58.971	82.5	87.085	88.676	73.676	36.558	79.756	41.26	71.362	68.088	71.689	65.842	66.333
17a	1	BW	0.468	34.412	38.088	39.412	68.424	53.971	66.029	67.083	86.707	69.307	71.348	77.725	75.608	76.985	76.28
18a	1	BW	1.604	13.529	58.088	54.118	72.246	55.588	64.412	63.393	96.055	87.561	79.248	74.68	79.431	78.079	82.509
19a	1	BW	0	26.029	8.382	63.382	68.288	75.735	37.647	77.803	86.98	86.04	80.769	74.092	67.781	79.868	79.255
20a	1	BW	3.476	47.794	50.441	62.206	76.955	55.294	57.059	63.83	89.927	73.564	76.372	83.857	74.492	75.728	78.99
25a	1	BW	5.414	28.971	46.765	44.412	72.989	69.559	46.029	57.311	89.956	75.32	78.813	78.691	80.305	78.113	80.2
26a	1	BW	6.751	52.941	51.912	65.882	63.425	70	71.618	34.929	67.051	69.734	71.914	66.621	71.736	58.699	67.626
27a	1	BW	1.203	48.971	69.412	56.324	76.07	57.794	51.324	68.454	87.266	77.861	82.583	86.05	61.755	70.737	77.709
28a	1	BW	0	25.294	42.941	30.882	14.545	17.059	47.941	68.059	93.733	76.333	80.715	87.017	74.607	81.953	82.393
5a	1	FW	2.206	80.147	88.382	88.676	85.735	84.265	76.516	35.266	56.16	53.303	56.108	68.303	64.143	70.92	61.49
6a	1	FW	0	39.853	66.176	61.912	59.706	70.294	42.221	74.454	87.556	73.335	74.924	80.195	73.928	78.298	78.04
7a	1	FW	1.872	72.353	86.324	79.118	51.471	61.324	52.596	60.986	81.836	72.62	76.467	64.482	86.038	48.606	71.675
8a	1	FW	0.668	51.324	39.265	77.941	43.676	57.059	55.872	67.557	87.839	76.406	73.027	63.14	75.198	72.429	74.673
13a	1	FW	9.759	49.559	68.971	60.882	77.5	88.529	72.677	31.107	66.008	56.462	62.859	71.96	62.327	53.308	62.154
14a	1	FW	1.136	27.353	53.235	64.265	57.647	78.088	81.374	41.115	77.837	59.612	87.136	66.147	69.68	54.189	69.1
15a	1	FW	21.524	61.618	55.294	82.353	68.971	50.147	79.488	23.672	60.471	77.556	76.711	63.267	52.126	51.323	63.576
16a	1	FW	0.334	40.882	88.676	81.176	85.735	77.941	77.429	66.604	82.195	80.222	73.154	75.386	73.247	65.667	74.978
21a	1	FW	0.869	13.971	33.382	68.382	53.676	48.088	44.604	69.789	88.94	76.641	77.329	82.019	83.064	67.212	79.201
22a	1	FW	0.334	78.529	39.853	18.824	76.618	59.118	61.947	73.29	85.151	68.586	83.643	71.951	67.31	72.129	74.795
23a	1	FW	0	52.353	70	68.824	71.765	68.235	64.361	73.962	82.205	71.909	87.563	71.123	53.967	50.151	69.486
24a	1	FW	10.896	76.471	72.941	83.088	61.324	79.706	76.034	30.49	55.608	64.319	67.075	63.003	61.44	75.376	64.47
29a	1	FW	2.54	6.176	31.176	80.735	75.882	83.529	77.049	62.011	94.604	75.095	70.066	76.008	74.241	70.129	76.691
30a	1	FW	12.968	42.647	45	50.588	46.471	58.529	45.593	31.329	71.733	46.025	72.302	62.751	68.245	72.976	65.672
31a	1	FW	0	20.588	30.147	27.647	55.441	43.971	50.39	64.56	96.062	85.107	69.797	71.97	74.185	65.63	77.125
32a	1	FW	1.939	81.912	78.824	44.559	23.529	52.059	60.106	60.775	84.822	64.294	68.567	75.825	76.711	59.875	71.683
