# Supplementary material for: Bed nucleus of the stria terminalis regulates fear to unpredictable threat signals
Source: eLife. 2019 Apr 4;8:e46525. doi: 10.7554/eLife.46525 (PMC6456295; doi:10.7554/eLife.46525)
Supplement: Figure 2—source data 1. [file elife-46525-fig2-data1.xlsx]

## Sheet: Fig. 2
Figure 2			Conditioning							Test
			Freezing (%)							Freezing (%)
			BL	Two-trial blocks						BL	Two-trial blocks						Test (trials 1-2)
RAT #	COHORT #	GROUP ASSIGNMENT		1	2	3	4	5	6		1	2	3	4	5	6	Freezing (%)
40a	1	BW-MUS	2.807	38.235	28.529	48.382	33.014	61.912	72.647	59.516	31.571	31.857	17.286	24.673	32.857	46.429	31.571
31a	1	BW-MUS	8.556	73.235	42.647	73.971	69.875	80.735	73.824	13.405	39.286	23.429	46.571	22.114	25.857	13.286	39.286
36a	1	BW-MUS	14.372	67.059	63.824	58.088	31.393	30.294	27.353	52.642	76.857	29.429	39.429	89.58	53.143	57.143	76.857
26a	1	BW-MUS	13.503	47.059	70.882	80.882	82.678	79.412	77.794	16.6	23.143	76	47.714	34.394	75.714	90.714	23.143
1b	2	BW-MUS	1.471	29.265	68.088	57.206	79.008	64.853	72.353	31.727	0	8.143	2.714	6.712	4.571	56.714	0
7b	2	BW-MUS	0.334	3.824	73.088	61.324	82.08	75	29.412	10.607	19.857	8.429	17	17.259	16.714	48.143	19.857
13b	2	BW-MUS	0.668	14.412	46.765	58.971	54.632	67.206	75.147	6.471	33	7.286	32.714	44.374	68.429	36.571	33
37a	1	BW-VEH	16.243	39.412	54.412	68.529	75.192	77.5	66.471	44.146	66	68.286	35.714	74.153	55.714	82	66
22a	1	BW-VEH	1.537	3.971	57.5	44.265	53.016	47.794	52.206	22.707	79.857	37.429	12.143	14.997	22.857	19.571	79.857
7a	1	BW-VEH	6.684	58.529	49.853	69.265	56.969	47.353	72.941	73.685	70.857	63.857	28.286	27.398	7.571	1.857	70.857
27a	1	BW-VEH	23.195	57.941	65.882	57.059	48.46	69.559	41.029	59.329	70.429	51.714	3.143	5.989	4.714	12	70.429
20b	2	BW-VEH	0.334	34.265	62.647	66.912	81.201	76.471	85.441	18.987	78.286	60	70.857	23.387	20.714	68.857	78.286
6b	2	NoCS(Cond)-MUS	0.334	0	38.382	78.824	45	61.471	61.765	17.133	90.143	38.429	59.286	62.2	33.429	59.857	90.143
22b	2	NoCS(Cond)-MUS	3.743	8.382	44.706	72.5	56.324	67.5	72.941	28.324	34.429	9.143	34.714	18.821	41.857	30.143	34.429
24b	2	NoCS(Cond)-MUS	7.553	4.706	83.235	77.353	75.441	69.412	86.324	17.186	2.429	6.286	14.143	26.375	4.714	58.286	2.429
29b	2	NoCS(Cond)-MUS	3.209	17.5	47.059	72.794	50.294	62.206	82.353	63.722	86.143	86.429	79.857	69.906	52.714	40	86.143
28b	2	NoCS(Cond)-MUS	0.334	9.706	71.471	88.971	44.559	65.294	60.294	13.338	13.429	46.571	25.286	29.547	9.143	20.286	13.429
18b	2	NoCS(Cond)-MUS	1.939	3.529	26.471	54.559	28.971	65.147	69.265	11.8	13.143	54.857	12.857	51.654	14.714	18.571	13.143
30a	1	NoCS(Cond)-VEH	0	4.265	22.5	25.147	34.118	34.853	34.118	3.341	28.429	26	27.429	30.965	25.429	35.714	28.429
35a	1	NoCS(Cond)-VEH	2.807	52.059	59.559	53.088	72.353	49.265	62.353	32.51	9.429	21	25.429	28.385	13.571	12.286	9.429
20a	1	NoCS(Cond)-VEH	0.334	11.765	44.265	78.971	79.118	50.147	57.059	44.267	33.857	17.857	14	30.669	19.571	18.429	33.857
11a	1	NoCS(Cond)-VEH	0.401	1.176	35	62.206	56.471	46.912	61.029	33.895	54.143	66.571	54.714	29.418	7.714	3.571	54.143
5b	2	NoCS(Cond)-VEH	0.334	15.441	48.676	67.5	71.176	60.147	83.088	34.325	38.857	56.571	25.571	35.521	23.429	24.143	38.857
11b	2	NoCS(Cond)-VEH	0	34.118	55	36.765	54.559	24.706	55.882	42.514	75.429	98	79.429	38.92	28.143	35.571	75.429
17b	2	NoCS(Cond)-VEH	0.334	10	46.029	60.735	27.794	49.118	75.294	30.205	51.286	12.143	23.429	27.831	12.857	43.143	51.286
38a	1	RANDOM-MUS	2.406	46.765	58.235	60	55.735	64.853	58.382	28.085	40.714	21.857	54.286	36.949	62.714	31	40.714
33a	1	RANDOM-MUS	1.872	4.412	28.824	36.618	35.735	37.647	63.824	0.338	24.143	13	17	20.978	25.143	23.143	24.143
23a	1	RANDOM-MUS	10.027	49.412	41.618	82.5	82.647	53.824	56.912	5.938	44.286	70.429	59.857	30.948	42.143	56.714	44.286
8a	1	RANDOM-MUS	22.794	18.971	46.618	53.235	47.059	28.382	53.824	1.067	5.143	36.286	20	1.14	29.429	44.714	5.143
28a	1	RANDOM-MUS	7.086	72.794	64.412	63.676	62.5	60	36.765	29.075	72.571	39.857	35.286	43.834	44	68	72.571
23b	2	RANDOM-MUS	0.334	4.853	50	52.647	68.529	41.029	72.647	14.283	26.714	47.714	33.857	30.094	37.143	34.143	26.714
25b	2	RANDOM-MUS	0	8.529	37.5	23.824	22.206	47.794	63.529	50.723	47.286	69.714	33	33.669	29.857	47	47.286
9b	2	RANDOM-MUS	1.003	47.059	56.471	88.529	38.235	50.882	51.029	17.823	50	58.143	55.857	48.613	43.286	21.143	50
16b	2	RANDOM-MUS	1.671	28.824	87.941	54.265	52.794	53.088	67.353	7.077	24.714	64	32.857	46.624	48.714	55.143	24.714
34a	1	RANDOM-VEH	6.083	37.059	80.588	86.324	82.5	75.294	55	16.844	43.286	7.286	0	0.714	2.429	30.571	43.286
9a	1	RANDOM-VEH	9.893	64.412	71.618	50.735	55.147	53.235	53.824	8.877	65.143	59.857	30.571	9.845	20.571	12.857	65.143
18a	1	RANDOM-VEH	13.837	22.794	47.059	63.529	3.382	45.882	30	67.599	89.429	95.143	92.714	90.739	45.143	0	89.429
24a	1	RANDOM-VEH	1.872	15.882	48.382	54.706	47.206	37.5	45.882	32.54	82	84.143	64	6.562	0	8.571	82
4b	2	RANDOM-VEH	0	5.441	37.941	68.235	59.265	53.971	38.235	84.234	90.571	99.429	98.714	98.429	57.714	22.714	90.571
15b	2	RANDOM-VEH	7.487	7.206	25.735	6.765	28.824	5.294	42.5	4	76.857	79.571	55.429	28.243	31.286	55.571	76.857
