# Supplementary material for: Bed nucleus of the stria terminalis regulates fear to unpredictable threat signals
Source: eLife. 2019 Apr 4;8:e46525. doi: 10.7554/eLife.46525 (PMC6456295; doi:10.7554/eLife.46525)
Supplement: Figure 3—source data 1. [file elife-46525-fig3-data1.xlsx]

## Sheet: Fig. 3
Figure 3			Conditioning							Test
			Freezing (%)							Freezing (%)
			BL	Two-trial blocks						BL	Two-trial blocks						Test (trials 1-12)	Test (BL subtraction)
RAT #	COHORT #	GROUP ASSIGNMENT		1	2	3	4	5	6		1	2	3	4	5	6	Freezing (%)	Freezing (%)
1a	1	FIXED-MUS	0.334	34.559	61.618	87.5	76.618	76.471	63.793	11.564	46.857	58.143	35.714	18.429	14.714	11.286	30.8572	19.293
5a	1	FIXED-MUS	0.668	52.059	43.824	36.912	40.882	37.059	52.693	27.273	84.571	87.429	51.714	3.857	10.571	11.286	41.5713	14.299
9a	1	FIXED-MUS	1.203	11.029	68.971	65.882	80.294	61.324	70.619	50.334	71.286	80	49.714	39.429	38.286	3	46.9525	-3.382
13a	1	FIXED-MUS	23.797	86.324	68.529	72.353	75.735	81.176	86.034	9.425	88.571	97.714	97.286	99.286	94	73.143	91.6667	82.242
17a	1	FIXED-MUS	1.003	8.088	50.147	46.324	62.206	51.765	49.488	1.671	22.429	70.571	37.143	62.714	39	52	47.3095	45.638
21a	1	FIXED-MUS	1.003	23.088	43.529	60.147	61.471	75.441	74.138	25.067	71.571	93.571	93.143	90.286	91.286	83	87.1428	62.076
25a	1	FIXED-MUS	0.334	19.706	55.441	64.706	42.206	58.235	33.793	5.348	24.857	44.714	18.429	33.286	49.286	6.143	29.4525	24.105
29a	1	FIXED-MUS	26.337	33.235	39.265	22.353	55.588	83.971	14.468	5.08	64.286	87.714	86.429	83.286	82.714	57	76.9048	71.825
2a	1	FIXED-VEH	3.275	20.882	58.971	59.412	56.324	66.029	52.683	45.856	88.571	68.571	75.286	50	79.714	60.571	70.4522	24.597
10a	1	FIXED-VEH	15.976	68.529	73.824	89.559	85.294	79.706	85.507	0.668	2.286	6	3	9.857	0	37.857	9.83333	9.165
14a	1	FIXED-VEH	0.869	6.324	80.441	76.324	52.5	34.265	13.656	6.885	80.143	94.857	55.429	62.857	70.286	31.429	65.8335	58.948
18a	1	FIXED-VEH	0	42.647	77.647	66.176	59.559	80.882	85.654	14.238	39.286	58.857	32	11.286	7.286	9.714	26.4048	12.167
22a	1	FIXED-VEH	7.821	67.5	78.824	86.618	84.559	83.382	82.399	14.973	87.714	97.571	93.714	66	56.429	42.571	73.9998	59.027
26a	1	FIXED-VEH	0	22.206	82.353	82.5	70.441	79.265	69.153	1.939	54.286	14.571	55.143	33.429	59.571	60.429	46.2382	44.3
30a	1	FIXED-VEH	0.735	9.118	13.971	43.088	46.765	57.059	70.963	4.211	75.286	58.571	76.714	79.714	38	7.286	55.9285	51.717
3a	1	VARIABLE-MUS	9.225	57.059	57.647	88.529	81.176	84.853	86.983	8.89	65.571	73.143	53.714	55.286	13.429	53.857	52.5	43.61
7a	1	VARIABLE-MUS	1.203	2.353	57.941	77.647	80.441	47.206	42.596	0.936	65.857	93.857	93	79.571	61.571	43	72.8093	71.874
11a	1	VARIABLE-MUS	0	0.882	18.971	26.324	61.029	30.441	28.966	34.492	92.429	88.571	78.286	87.286	43.286	83.857	78.9525	44.46
15a	1	VARIABLE-MUS	13.369	57.5	91.912	77.206	73.088	87.353	71.673	7.353	32.571	29.857	26.143	15.286	13.429	17.857	22.5238	15.171
19a	1	VARIABLE-MUS	0.735	23.529	86.912	93.971	91.765	87.353	75.162	29.545	81.286	99	91.857	86	80.429	32.286	78.4763	48.931
23a	1	VARIABLE-MUS	2.273	2.794	16.029	32.941	57.206	28.529	7.059	3.142	33.286	49.143	50.143	18.429	9.429	30.143	31.7622	28.62
27a	1	VARIABLE-MUS	16.711	79.118	82.059	93.235	76.471	76.176	39.057	87.233	99.857	100	99.714	99.571	95.429	89.143	97.2857	10.053
31a	1	VARIABLE-MUS	0.468	53.676	79.265	53.382	36.765	71.176	49.468	7.687	8.571	7.143	0	1.429	4	2.857	4	-3.687
4a	1	VARIABLE-VEH	1.07	22.647	75.735	90.882	89.265	55.735	59.914	57.955	92	73.714	8.286	52	41.143	58.286	54.2382	-3.716
8a	1	VARIABLE-VEH	0.334	63.971	89.265	90.735	85.147	83.824	64.452	12.5	90.429	91.286	85.286	76.143	85	83.714	85.3097	72.81
12a	1	VARIABLE-VEH	0.401	27.794	37.794	73.676	66.618	23.529	34.376	16.377	49.429	77.857	67.143	22.857	36.714	45.857	49.9762	33.599
16a	1	VARIABLE-VEH	28.877	71.618	86.912	94.706	69.706	95.147	79.579	80.949	88.286	92.429	96.143	98	92.857	95	93.7858	12.837
20a	1	VARIABLE-VEH	0	8.824	40.882	69.853	52.059	17.353	41.562	68.449	99	100	99.143	100	99.714	62.429	93.381	24.932
24a	1	VARIABLE-VEH	2.674	0.882	2.353	24.265	30	25.441	21.293	0.334	78	94.714	95.857	53.857	78.286	35.714	72.738	72.404
28a	1	VARIABLE-VEH	8.422	81.324	89.265	93.235	87.647	73.088	67.262	45.722	93.429	94.571	98.429	97.857	88.286	85.571	93.0238	47.302
