# Supplementary material for: Bed nucleus of the stria terminalis regulates fear to unpredictable threat signals
Source: eLife. 2019 Apr 4;8:e46525. doi: 10.7554/eLife.46525 (PMC6456295; doi:10.7554/eLife.46525)
Supplement: Figure 4—source data 1. [file elife-46525-fig4-data1.xlsx]

## Sheet: Fig. 4
Figure 4			Conditioning							Test
			Freezing (%)							Freezing (%)
			BL	Two-trial blocks						BL	Two-trial blocks						Test (trials 1-12
RAT #	COHORT #	GROUP ASSIGNMENT		1	2	3	4	5	6		1	2	3	4	5	6	Freezing (%)
10a	1	BW	0	15.147	13.235	18.088	46.113	29.559	23.824	2.072	64.857	98.714	93.286	9	5.286	10.571	46.952
13a	1	BW	4.211	26.176	6.471	27.353	38.305	54.559	77.206	13.837	53.714	77.429	15.571	14.286	33.571	38.286	38.81
15a	1	BW	0	26.765	52.941	9.559	22.915	40.588	53.824	6.217	14.714	36.143	8.857	43.857	12.857	43.429	26.643
1a	1	BW	0	5.735	22.941	12.647	28.94	46.765	32.206	29.278	56.714	16.143	71	6.286	43.429	83.286	46.143
2a	1	BW	0.869	38.824	70.441	71.029	33.938	67.647	71.618	31.15	41.857	53	55.286	84.143	58.286	37.286	54.976
14b	2	BW	18.717	61.618	65.735	77.353	75.62	48.676	79.118	64.238	79	86.429	83.857	61.286	85	80.857	79.405
15b	2	BW	23.663	40.441	78.529	73.824	49.341	49.853	67.206	74.465	98.286	99.429	94.714	61.857	91.286	93.571	89.857
19b	2	BW	0.802	31.471	59.559	65	55.035	63.235	62.794	69.586	94.571	98.143	78.714	95.143	44.571	12.143	70.548
10c	3	BW	0.401	20.735	34.118	58.824	32.909	59.706	66.618	4.278	17.429	20.143	3.286	16.571	10.286	6.857	12.429
19c	3	BW	26.939	60.588	30.882	24.265	74.881	42.206	63.088	2.941	86.571	97.143	86.571	85.143	70.571	90.857	86.143
1c	3	BW	21.39	81.471	88.088	59.118	85.462	66.176	86.176	9.626	48.286	57.714	22.714	63	66.857	46.429	50.833
22c	3	BW	0.401	15	41.618	60.882	64.78	9.559	31.324	13.703	39.571	42.143	47.571	29.714	51.571	41.571	42.024
2c	3	BW	2.741	20.294	55.735	68.676	47.581	51.471	17.206	0.401	57.857	7.714	23.286	28.857	0.857	4.714	20.548
9c	3	BW	1.404	28.382	49.559	73.235	23.617	71.912	76.618	22.928	53	37.571	40.429	88.143	97.571	61.143	62.976
11b	2	FW	27.34	78.382	83.529	75	79.265	71.765	76.572	10.227	94	90.143	66.143	88	83.429	95.571	86.214
17b	2	FW	0.802	64.853	56.029	53.529	67.206	70.294	63.164	5.682	81	91.429	71	16.714	36.571	74.571	61.881
18b	2	FW	3.275	20.735	57.647	74.265	47.941	73.676	77.576	40.709	90.571	99.714	99.857	99.857	97.286	96.714	97.333
21b	2	FW	0	58.088	77.647	83.824	66.765	77.5	69.746	2.54	70.571	99.429	100	98.857	92.857	54.571	86.048
4b	2	FW	0	46.324	73.971	80.735	68.088	39.118	53.798	7.42	95.857	98.857	86.286	84.714	9	20.571	65.881
7b	2	FW	17.848	59.706	75.735	86.176	86.765	69.412	82.825	1.872	64.429	93.143	88.286	87	93	94	86.643
20c	3	FW	2.607	31.765	42.794	4.412	37.647	32.206	43.205	7.353	15.714	21.143	15.714	29.286	19.714	22.286	20.643
6c	3	FW	0.802	2.059	50	74.853	81.765	69.265	12.586	1.537	75.143	93.429	99.857	99.714	96.286	93.714	93.024
14a	1	NoCS(Test)	0	12.059	37.941	37.353	60.358	41.765	56.324	24.866	3.571	22.714	12.857	15.714	3.857	6.714	10.905
16a	1	NoCS(Test)	6.484	64.118	43.382	52.794	26.694	66.765	62.794	9.091	27.429	37.571	26.286	38.714	59.714	50.857	40.095
8a	1	NoCS(Test)	0.401	35	44.559	62.5	60.947	52.941	35.588	2.206	7.857	3.857	0.714	2.571	26.857	33.857	12.619
9a	1	NoCS(Test)	0	0	12.206	32.059	36.127	51.176	36.618	2.807	7.143	6	2.714	5.857	12.571	32.571	11.143
10b	2	NoCS(Test)	0.334	23.529	31.324	42.059	44.412	53.971	33.494	6.283	21.143	67.714	11.571	38.857	87.857	64.143	48.548
13b	2	NoCS(Test)	29.412	50	66.324	44.412	71.176	51.324	77.764	7.286	2.429	8.714	8.571	6.571	8.857	68.286	17.238
16b	2	NoCS(Test)	3.61	57.647	68.529	68.382	82.5	52.794	51.633	0.668	0	18.571	1.571	0.857	6	1.571	4.762
22b	2	NoCS(Test)	10.495	50.735	50.882	64.706	81.029	42.059	76.81	44.519	41.714	7.714	89.143	73.143	20.714	3.429	39.31
2b	2	NoCS(Test)	4.078	34.265	57.5	57.353	73.12	69.412	54.118	21.524	59.286	6.857	0	0	1.143	1.571	11.476
8b	2	NoCS(Test)	2.941	44.853	71.618	76.471	57.353	73.382	73.027	2.473	9	4.714	5.286	29.286	39.143	11.571	16.5
9b	2	NoCS(Test)	18.516	76.471	66.471	68.529	71.495	56.029	90.147	6.417	1.429	0.714	44.286	14.429	19.714	37	19.595
11c	3	NoCS(Test)	10.16	18.971	27.5	48.088	58.971	67.794	58.96	0	0	1.143	5.857	1.571	3.714	16.857	4.857
14c	3	NoCS(Test)	2.005	13.235	35.294	61.618	18.382	43.971	48.945	39.372	25.429	94.857	33.429	7.857	14.429	17	32.167
15c	3	NoCS(Test)	4.88	21.324	56.618	29.706	62.258	80.882	67.647	17.179	24.571	51.714	43.857	38	35.857	47.143	40.19
4c	3	NoCS(Test)	0.334	2.647	27.5	45.588	47.941	55.294	36.623	28.075	57	69.286	27.571	27.857	64.857	92.286	56.476
5c	3	NoCS(Test)	1.471	7.206	66.324	54.265	34.966	37.941	45.588	42.179	20	66.429	70.571	39.714	43.714	84.429	54.143
7c	3	NoCS(Test)	16.511	56.176	30.735	80.294	70.041	70.294	74.118	13.102	38.143	47	34.429	46.571	53.143	59.429	46.452
11a	1	NoTest	0	5.735	16.176	10.882	16.176	15.147	33.088	NA	NA	NA	NA	NA	NA	NA	NA
4a	1	NoTest	0	1.912	33.235	53.824	39.796	48.824	71.324	NA	NA	NA	NA	NA	NA	NA	NA
6a	1	NoTest	1.07	43.676	62.353	49.853	65.614	60.147	50.441	NA	NA	NA	NA	NA	NA	NA	NA
7a	1	NoTest	10.027	40	67.5	61.471	78.11	82.353	79.265	NA	NA	NA	NA	NA	NA	NA	NA
20b	2	NoTest	0	46.176	66.324	63.088	68.567	47.059	76.471	NA	NA	NA	NA	NA	NA	NA	NA
12c	3	NoTest	19.184	53.235	28.382	80.882	70.923	78.529	46.324	NA	NA	NA	NA	NA	NA	NA	NA
3c	3	NoTest	0.334	40.441	47.206	65.588	69.896	76.029	65.147	NA	NA	NA	NA	NA	NA	NA	NA
8c	3	NoTest	1.003	62.206	57.794	61.912	80.906	67.353	69.706	NA	NA	NA	NA	NA	NA	NA	NA
