# Supplementary material for: Bed nucleus of the stria terminalis regulates fear to unpredictable threat signals
Source: eLife. 2019 Apr 4;8:e46525. doi: 10.7554/eLife.46525 (PMC6456295; doi:10.7554/eLife.46525)
Supplement: Figure 5—source data 1. [file elife-46525-fig5-data1.xlsx]

## Sheet: Fig. 5
Figure 5
			dBNST	ovBNST	vBNST
RAT #	COHORT #	GROUP ASSIGNMENT	Fos/0.1mm^2
10a	1	BW	4.613	1.021	8.812
10c	3	BW	4.613	0.479	9.828
13a	1	BW	6.228	4.468	9.263
14b	2	BW	0.615	0.511	11.749
15a	1	BW	2.768	0.511	10.845
15b	2	BW	2.768	1.659	7.682
19b	2	BW	3.69	1.276	10.393
19c	3	BW	6.228	0.191	14.573
1a	1	BW	7.996	7.531	22.368
1c	3	BW	12.917	3.753	22.368
22c	3	BW	2.768	0.287	9.998
2a	1	BW	8.304	3.574	13.782
2c	3	BW	11.533	2.681	24.062
9c	3	BW	4.152	0	15.42
11b	2	FW	4.613	0.894	7.908
17b	2	FW	1.538	1.021	1.582
18b	2	FW	3.383	1.021	5.197
20c	3	FW	2.537	0	2.203
21b	2	FW	1.538	1.404	7.23
4b	2	FW	6.151	1.787	7.456
6c	3	FW	12.917	2.681	10.676
7b	2	FW	0.308	0.128	0.452
10b	2	NoCS(Test)	6.766	0.255	7.23
11c	3	NoCS(Test)	5.305	0.383	7.117
13b	2	NoCS(Test)	2.46	1.149	2.033
14a	1	NoCS(Test)	10.61	1.149	7.23
14c	3	NoCS(Test)	6.689	0.957	1.695
15c	3	NoCS(Test)	9.687	1.053	8.134
16a	1	NoCS(Test)	2.153	0.638	6.1
16b	2	NoCS(Test)	1.845	1.149	4.519
22b	2	NoCS(Test)	1.538	1.021	5.648
2b	2	NoCS(Test)	1.23	0.255	1.13
4c	3	NoCS(Test)	6.458	1.819	8.473
5c	3	NoCS(Test)	13.609	2.425	17.454
7c	3	NoCS(Test)	8.765	0.287	19.995
8a	1	NoCS(Test)	3.69	1.659	13.104
8b	2	NoCS(Test)	0	0.511	6.552
9a	1	NoCS(Test)	6.458	1.276	4.519
9b	2	NoCS(Test)	4.921	1.149	4.519
11a	1	NoTest	0.461	0.128	0.226
12c	3	NoTest	2.768	0.191	1.525
20b	2	NoTest	3.998	1.532	2.485
3c	3	NoTest	1.153	4.308	3.05
4a	1	NoTest	1.538	2.17	0
6a	1	NoTest	1.845	5.552	2.033
7a	1	NoTest	2.768	2.808	5.423
8c	3	NoTest	0.308	10.467	5.592
