# Supplementary material for: Bed nucleus of the stria terminalis regulates fear to unpredictable threat signals
Source: eLife. 2019 Apr 4;8:e46525. doi: 10.7554/eLife.46525 (PMC6456295; doi:10.7554/eLife.46525)
Supplement: Figure 6—source data 1. [file elife-46525-fig6-data1.xlsx]

## Sheet: Fig. 6
Figure 6
			IL	PL	BLA	HPC
RAT #	COHORT #	GROUP ASSIGNMENT	CTb/0.1mm^2
22c	3	BW	34.05	0.138	38.183	182.265
10a	1	BW	3.248	0.414	3.389	15.525
2c	3	BW	43.709	1.035	54.903	103.165
2a	1	BW	44.33	1.38	53.999	48.128
9c	3	BW	63.152	3.036	58.97	95.713
19c	3	BW	53.215	3.312	85.63	52.537
15a	1	BW	60.572	3.45	37.506	84.457
10c	3	BW	50.254	4.968	92.521	119.047
1a	1	BW	37.26	6.624	61.681	73.9
15b	2	BW	47.77	7.314	61.907	135.69
14b	2	BW	59.425	9.66	30.953	100.913
13a	1	BW	42.802	12.972	42.476	53.096
19b	2	BW	37.643	18.63	77.497	61.48
1c	3	BW	76.909	28.98	60.325	69.863
21b	2	FW	26.369	1.38	19.431	47.507
11b	2	FW	43.948	2.898	32.987	155.562
17b	2	FW	44.521	4.002	27.338	104.95
20c	3	FW	45.19	4.554	69.363	66.882
7b	2	FW	47.005	7.866	51.966	118.302
18b	2	FW	64.585	22.08	55.129	34.466
6c	3	FW	61.193	23.874	85.947	104.64
4b	2	FW	59.808	24.288	66.2	35.087
7a	1	NoTest	13.949	0	46.995	113.644
11a	1	NoTest	29.426	0.552	24.401	110.229
20b	2	NoTest	41.655	4.416	54.451	52.475
6a	1	NoTest	52.356	4.83	27.338	89.735
3c	3	NoTest	78.82	7.349	64.166	63.032
12c	3	NoTest	74.177	8.142	57.388	13.6
4a	1	NoTest	65.54	9.66	48.125	90.977
8c	3	NoTest	94.488	14.076	50.384	20.307
