# Supplementary material for: Bed nucleus of the stria terminalis regulates fear to unpredictable threat signals
Source: eLife. 2019 Apr 4;8:e46525. doi: 10.7554/eLife.46525 (PMC6456295; doi:10.7554/eLife.46525)
Supplement: Figure 7—source data 1. [file elife-46525-fig7-data1.xlsx]

## Sheet: Fig. 7
Figure 7
			IL	PL	BLA	HPC	IL	PL	BLA	HPC
RAT #	COHORT #	GROUP ASSIGNMENT	Fos/0.1mm^2				Fos-CTb%
22c	3	BW	8.713	10.764	3.615	3.63	21.231	0	4.011	9.521
10a	1	BW	8.025	10.764	2.937	3.416	33.72	0	0	18.63
2c	3	BW	6.019	7.866	4.858	9.548	13.156	0	18.131	16.822
2a	1	BW	6.497	8.97	8.36	10.868	27.179	0	28.36	36.058
9c	3	BW	3.439	8.556	7.456	20.26	11.274	37.637	40.513	43.062
19c	3	BW	4.873	9.384	4.293	13.786	14.408	17.25	14.307	36.335
15a	1	BW	8.599	14.352	0.904	8.384	27.125	0	0	17.123
10c	3	BW	2.962	8.142	7.456	15.836	10.898	11.5	33.104	46.648
1a	1	BW	3.057	3.588	4.067	8.073	14.698	0	14.897	23.483
15b	2	BW	9.172	6.762	2.485	0.932	25.222	0	4.948	4.263
14b	2	BW	8.79	13.524	5.874	1.863	22.118	17.743	34.633	14.331
13a	1	BW	10.318	14.214	3.615	8.384	25.591	17.617	3.605	32.685
19b	2	BW	14.904	8.97	5.423	6.521	32.008	3.067	7.905	23.523
1c	3	BW	10.032	7.866	2.305	1.242	34.893	5.914	4.57	4.14
21b	2	FW	0.573	0.828	1.356	8.384	0	0	0	12.177
11b	2	FW	7.07	8.142	1.13	2.174	9.969	0	0	3.719
17b	2	FW	4.395	7.314	7.908	14.904	2.46	42.828	50.416	35.827
20c	3	FW	4.777	4.692	5.648	5.403	15.755	25.091	22.079	20.758
7b	2	FW	3.822	7.452	4.519	3.726	16.312	0	20.629	19.559
18b	2	FW	8.981	9.384	2.033	2.795	15.264	15.525	2.778	8.392
6c	3	FW	9.458	17.388	8.269	22.822	25.507	40.682	34.211	44.226
4b	2	FW	2.293	0.828	1.13	2.795	9.157	0	2.313	0
7a	1	NoTest	1.338	1.104	0.452	1.553	0	0	0	5.09
11a	1	NoTest	0.382	0.69	0	1.863	0	0	0	2.624
20b	2	NoTest	0.573	0	0	0	2.63	0	0	0
6a	1	NoTest	1.529	5.106	0	2.795	10.461	0	0	3.223
3c	3	NoTest	2.58	3.002	0.791	1.863	5.559	5.831	3.58	0
12c	3	NoTest	6.191	11.73	3.05	0.559	12.404	7.017	21.348	0
4a	1	NoTest	1.146	1.242	0.678	1.863	3.342	0	3.182	3.179
8c	3	NoTest	3.153	2.346	0.678	0.186	7.535	16.235	4.559	0
